# Supplementary material
Source: MDPI journal article supplement (https://www.mdpi.com/2073-445X/10/12/1348)
Supplement: s1 [file s1]

**Table S1: Estimation of models**

| dependent variable<br>model  | price_sgm<br>model_1         | ROA_indiv<br>model_2    | ROA_neighb<br>model_3   | dist_clust1<br>model_4  | dist_clust2<br>model_5  | business_density<br>model_6 |
|------------------------------|------------------------------|-------------------------|-------------------------|-------------------------|-------------------------|-----------------------------|
| (Intercept)                  | 10318.8173 ***<br>(171.5665) | -1.8805<br>(1.5312)     | 1.3586 ***<br>(0.3058)  | 2.7793 ***<br>(0.0365)  | 2.8309 ***<br>(0.0369)  | 58.3991 ***<br>(3.8066)     |
| ROA_indiv                    | 0.1193<br>(0.7739)           |                         | 0.0392 ***<br>(0.0013)  | 0.0001<br>(0.0002)      | 0.0001<br>(0.0002)      | 0.0377 *<br>(0.0161)        |
| ROA_around                   | -20.2275 ***<br>(3.8726)     | 0.9813 ***<br>(0.0316)  |                         | -0.0026 **<br>(0.0009)  | 0.0088 ***<br>(0.0009)  | 0.2591 **<br>(0.0805)       |
| knn (business_density)       | 4.1246 ***<br>(0.2994)       | 0.0060 *<br>(0.0026)    | 0.0017 **<br>(0.0005)   | -0.0003 ***<br>(0.0001) | -0.0035 ***<br>(0.0001) |                             |
| knn_own_sector               |                              | -0.0232 ***<br>(0.0043) | -0.0013<br>(0.0009)     | 0.0001<br>(0.0001)      | 0.0001<br>(0.0001)      | 0.4087 ***<br>(0.0105)      |
| knn_BusinessServices         | -11.4073 ***<br>(0.8083)     | -0.0004<br>(0.0068)     | -0.0115 ***<br>(0.0014) | -0.0010 ***<br>(0.0002) | 0.0010 ***<br>(0.0002)  | 1.9963 ***<br>(0.0110)      |
| knn_Wholesale                | -18.9322 ***<br>(1.1329)     | -0.0181<br>(0.0096)     | -0.0022<br>(0.0019)     | -0.0000<br>(0.0003)     | 0.0051 ***<br>(0.0003)  | 2.6829 ***<br>(0.0168)      |
| Pricesgm_around              |                              | -0.0000<br>(0.0001)     | -0.0001 ***<br>(0.0000) | 0.0000 *<br>(0.0000)    | -0.0000 ***<br>(0.0000) | 0.0021 ***<br>(0.0001)      |
| no_of_trans_around           | 3.1151 ***<br>(0.1760)       | -0.0011<br>(0.0015)     | -0.0009 **<br>(0.0003)  | 0.0005 ***<br>(0.0000)  | 0.0002 ***<br>(0.0000)  | -0.0063<br>(0.0037)         |
| popul_around                 | -18.6491 ***<br>(0.9695)     | -0.0009<br>(0.0081)     | 0.0003<br>(0.0016)      | -0.0018 ***<br>(0.0002) | -0.0015 ***<br>(0.0002) | 0.3883 ***<br>(0.0202)      |
| dist_clust1                  | 57.1537<br>(29.1707)         | 0.0894<br>(0.2427)      | -0.1459 **<br>(0.0485)  |                         | -0.3475 ***<br>(0.0061) | -2.7259 ***<br>(0.6061)     |
| dist_clust2                  | -305.7406 ***<br>(28.7489)   | 0.0751<br>(0.2398)      | 0.4886 ***<br>(0.0478)  | -0.3391 ***<br>(0.0060) |                         | -29.8728 ***<br>(0.5672)    |
| dist_clust1^2                | -9.6331 *<br>(3.9742)        | -0.0132<br>(0.0331)     | 0.0165 *<br>(0.0066)    | 0.1328 ***<br>(0.0002)  | 0.0416 ***<br>(0.0008)  | 0.1361<br>(0.0826)          |
| dist_clust2^2                | -6.1213<br>(4.3617)          | -0.0056<br>(0.0363)     | -0.0761 ***<br>(0.0072) | 0.0347 ***<br>(0.0009)  | 0.1448 ***<br>(0.0003)  | 4.0124 ***<br>(0.0869)      |
| dist_clust1^3                | -0.0655<br>(0.1573)          | 0.0004<br>(0.0013)      | -0.0003<br>(0.0003)     | -0.0050 ***<br>(0.0000) | -0.0014 ***<br>(0.0000) | 0.0004<br>(0.0033)          |
| dist_clust2^3                | 1.4701 ***<br>(0.2002)       | 0.0002<br>(0.0017)      | 0.0030 ***<br>(0.0003)  | -0.0008 ***<br>(0.0000) | -0.0060 ***<br>(0.0000) | -0.1567 ***<br>(0.0040)     |
| sec_Bank_Insur_FinServ       | -88.2556<br>(143.1408)       | 2.1290<br>(1.1911)      | 0.1492<br>(0.2380)      | -0.0545<br>(0.0316)     | -0.0569<br>(0.0320)     | 1.8218<br>(2.9757)          |
| sec_Biotech_and_LifeScien    | -262.5703<br>(179.1234)      | -0.1986<br>(1.4905)     | 0.1939<br>(0.2978)      | -0.0472<br>(0.0396)     | -0.0133<br>(0.0401)     | -2.6975<br>(3.7234)         |
| sec_BusinessServ             | -50.3237<br>(138.5916)       | 2.7732 *<br>(1.1618)    | 0.1936<br>(0.2322)      | -0.0450<br>(0.0308)     | -0.0256<br>(0.0312)     | -16.1907 ***<br>(2.9009)    |
| sec_Chemic_Petr_Rubber_Plast | -168.9608<br>(166.1918)      | 3.1623 *<br>(1.3827)    | 0.2313<br>(0.2763)      | -0.0616<br>(0.0367)     | -0.1017 **<br>(0.0372)  | -2.1505<br>(3.4545)         |
| sec_Communicat               | -300.0218<br>(164.1234)      | 0.6075<br>(1.3657)      | 0.3671<br>(0.2729)      | -0.0304<br>(0.0362)     | -0.0450<br>(0.0367)     | -1.3241<br>(3.4117)         |
| sec_CompHard                 | 63.4083<br>(325.8133)        | -1.6760<br>(2.7110)     | 0.6515<br>(0.5417)      | 0.0242<br>(0.0720)      | -0.0309<br>(0.0728)     | -0.2842<br>(6.7723)         |
| sec_CompSoft                 | -83.7033                     | 2.2866                  | 0.1943                  | -0.0597                 | -0.0344                 | -2.5927                     |

|                                 |             |           |          |            |           |              |
|---------------------------------|-------------|-----------|----------|------------|-----------|--------------|
|                                 | (143.8861)  | (1.1973)  | (0.2393) | (0.0318)   | (0.0322)  | (2.9911)     |
| sec_Constr                      | -164.0607   | 0.3371    | -0.0606  | -0.0525    | -0.0139   | 0.3104       |
|                                 | (139.8016)  | (1.1650)  | (0.2328) | (0.0309)   | (0.0313)  | (2.9102)     |
| sec_Food_Tobacco_Manuf          | -62.6075    | 2.9450 *  | 0.2402   | -0.0620    | -0.0383   | 1.6252       |
|                                 | (164.2429)  | (1.3665)  | (0.2731) | (0.0363)   | (0.0367)  | (3.4139)     |
| sec_Industr_Electric_Electro    | -296.3961   | 1.9746    | 0.1508   | -0.0857 *  | -0.0318   | -0.2427      |
|                                 | (158.6140)  | (1.3198)  | (0.2637) | (0.0350)   | (0.0355)  | (3.2972)     |
| sec_InformServ                  | -542.9232   | 2.8703    | 1.0587   | -0.0531    | 0.0252    | 5.7590       |
|                                 | (363.1365)  | (3.0216)  | (0.6038) | (0.0802)   | (0.0812)  | (7.5484)     |
| sec_Leather_Stone_Clay_Glass    | -454.2299   | 0.9488    | 0.1732   | -0.0702    | 0.0553    | 1.6349       |
|                                 | (239.2703)  | (1.9910)  | (0.3979) | (0.0528)   | (0.0535)  | (4.9738)     |
| sec_Media_Broadcast             | 14.8038     | 0.7206    | 0.2089   | -0.0379    | -0.0108   | -1.2166      |
|                                 | (147.1076)  | (1.2242)  | (0.2446) | (0.0325)   | (0.0329)  | (3.0582)     |
| sec_Metals_MetalProd            | -359.5317 * | 1.7933    | 0.1827   | -0.1117 ** | -0.0411   | -1.1190      |
|                                 | (175.8471)  | (1.4632)  | (0.2924) | (0.0388)   | (0.0393)  | (3.6554)     |
| sec_MiningExtr                  | -262.7668   | -2.6732   | -0.4396  | -0.0196    | -0.0214   | 2.8084       |
|                                 | (210.8565)  | (1.7545)  | (0.3506) | (0.0466)   | (0.0471)  | (4.3832)     |
| sec_Misc_Manuf                  | 13.2017     | 1.1035    | -0.2207  | -0.1438 ** | -0.0533   | 1.9804       |
|                                 | (225.5266)  | (1.8766)  | (0.3750) | (0.0498)   | (0.0504)  | (4.6879)     |
| sec_Print_Publish               | -5.0489     | 2.0988    | 0.1767   | -0.0318    | 0.0002    | -0.8225      |
|                                 | (152.5856)  | (1.2696)  | (0.2537) | (0.0337)   | (0.0341)  | (3.1717)     |
| sec_PropertyServ                | -84.6785    | 0.4191    | -0.0063  | -0.0512    | -0.0342   | -2.1415      |
|                                 | (139.8082)  | (1.1674)  | (0.2333) | (0.0310)   | (0.0314)  | (2.9164)     |
| sec_Publ_Adm_Edu_Health_SocServ | 48.9362     | 2.7457 *  | 0.1029   | -0.0541    | -0.0613   | -3.5938      |
|                                 | (142.9059)  | (1.1894)  | (0.2377) | (0.0316)   | (0.0320)  | (2.9714)     |
| sec_Retail                      | -293.0249 * | 2.0703    | 0.4560   | -0.0101    | 0.0295    | 3.0904       |
|                                 | (143.4600)  | (1.1944)  | (0.2387) | (0.0317)   | (0.0321)  | (2.9840)     |
| sec_Textiles_Cloth              | -72.8643    | 2.5158    | 0.1200   | -0.0208    | -0.0358   | -0.2677      |
|                                 | (204.2068)  | (1.6991)  | (0.3395) | (0.0451)   | (0.0457)  | (4.2446)     |
| sec_Transp_Manuf                | -28.6636    | 1.6859    | -0.4508  | -0.0281    | -0.0121   | 7.3244       |
|                                 | (258.6108)  | (2.1523)  | (0.4301) | (0.0571)   | (0.0578)  | (5.3765)     |
| sec_Transp_Freight_Storage      | -296.3374 * | 1.5282    | 0.1399   | -0.0316    | -0.0071   | -1.9979      |
|                                 | (149.7204)  | (1.2459)  | (0.2490) | (0.0331)   | (0.0335)  | (3.1124)     |
| sec_Travel_Pers_Leisure         | 51.3455     | 0.9220    | 0.1502   | -0.0382    | -0.0450   | -0.2316      |
|                                 | (142.6378)  | (1.1871)  | (0.2372) | (0.0315)   | (0.0319)  | (2.9655)     |
| sec_Uutilities                  | -127.0789   | -2.8913 * | -0.4822  | -0.1051 ** | -0.0149   | 5.8742       |
|                                 | (150.8787)  | (1.2554)  | (0.2509) | (0.0333)   | (0.0337)  | (3.1363)     |
| sec_Waste_Manag_Treat           | -95.0230    | 0.7198    | 0.3786   | -0.0371    | -0.1009 * | -2.6014      |
|                                 | (198.1971)  | (1.6492)  | (0.3295) | (0.0438)   | (0.0443)  | (4.1197)     |
| sec_Wholesale                   | -167.9865   | 2.2542    | 0.2268   | -0.0507    | -0.0353   | -10.6410 *** |
|                                 | (139.2817)  | (1.1614)  | (0.2321) | (0.0308)   | (0.0312)  | (2.9006)     |
| sec_Wood_Furnit_Paper_Manuf     | -154.7634   | 1.6486    | 0.0309   | -0.0454    | -0.0470   | 3.3756       |
|                                 | (180.9718)  | (1.5059)  | (0.3009) | (0.0400)   | (0.0405)  | (3.7619)     |
| -----                           |             |           |          |            |           |              |
| R^2                             | 0.2649      | 0.0539    | 0.1078   | 0.9885     | 0.9906    | 0.9668       |
| Adj.R^2                         | 0.2637      | 0.0522    | 0.1062   | 0.9884     | 0.9906    | 0.9668       |
| Num.obs.                        | 24134       | 24134     | 24134    | 24134      | 24134     | 24134        |

\*\*\*p<0.001; \*\*p<0.01; \*p<0.05
